# Supplementary material for: Two-stage upgrading of hydrothermal algae biocrude to kerosene-range biofuel
Source: Royal Society of Chemistry journal article supplement (doi:10.1039/c6gc01413e), 2016-01-01
Supplement: c6gc01413e1.pdf [file c6gc01413e1.pdf]

## Additional files

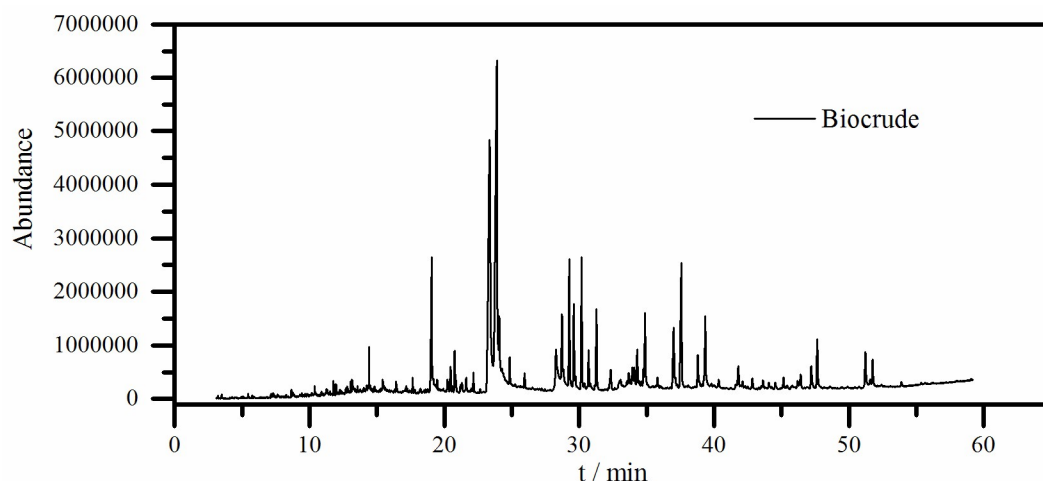

**Fig. 1 Total ion chromatogram of HTL obtained biocrude**

The main peaks of ion chromatogram for biocrude appeared between 10 min to 55 min. The highest two peaks were *cis*-9-Hexadecenoic acid and *n*-Hexadecenoic acid.

**Table 1 The composition of biocrude.**

| No | R.T. (min) | Compounds                                     | Formation | Area  |
|----|------------|-----------------------------------------------|-----------|-------|
| 1  | 3.487      | Toluene                                       | C7H8      | 0.07% |
| 2  | 5.444      | Bicyclo[4.2.0]octa-1,3,5-triene               | C8H8      | 0.08% |
| 3  | 7.138      | 2-Octanone                                    | C8H16O    | 0.07% |
| 4  | 7.315      | Pyrazine, 2-ethyl-6-methyl-                   | C7H10N2   | 0.07% |
| 5  | 7.613      | 2-(1-Pyrrolidinyl)ethyl 4-propoxysalicylate   | C16H23NO4 | 0.08% |
| 6  | 8.654      | Phenol, 4-methyl-                             | C7H8O     | 0.18% |
| 7  | 9.415      | 1H-Pyrrole, 2,3,4,5-tetramethyl-              | C8H13N    | 0.04% |
| 8  | 9.827      | Benzene, 1-ethyl-2,3-dimethyl-                | C10H14    | 0.06% |
| 9  | 10.239     | Nicotinyl Alcohol                             | C6H7NO    | 0.05% |
| 10 | 10.394     | 1H-Pyrrole, 3-ethyl-2,4,5-trimethyl-          | C11H14O3  | 0.12% |
| 11 | 11.246     | Phenol, 3-(ethylamino)-4-methyl-              | C9H13NO   | 0.08% |
| 12 | 11.304     | Phenol, 3-(ethylamino)-4-methyl-              | C9H13NO   | 0.06% |
| 13 | 11.773     | 1-Tridecene                                   | C13H26    | 0.23% |
| 14 | 11.967     | Indole                                        | C8H7N     | 0.26% |
| 15 | 12.711     | <i>o</i> -Methoxy-. $\alpha$ -.phenethylamine | C9H13NO   | 0.06% |
| 16 | 12.78      | Naphthalene, 1,2-dihydro-1,1,6-trimethyl-     | C13H16    | 0.21% |
| 17 | 13.06      | N-[2-Hydroxyethyl]succinimide                 | C6H9NO3   | 0.18% |
| 18 | 14.022     | N-(1-Adamantyl)acetamide                      | C12H19NO  | 0.10% |
| 19 | 14.233     | N-(1-Adamantyl)acetamide                      | C12H19NO  | 0.07% |
| 20 | 14.29      | Phenol, 3-(ethylamino)-4-methyl-              | C9H13NO   | 0.05% |
| 21 | 14.416     | 7-Hexadecene, ( <i>Z</i> )-                   | C16H32    | 0.42% |
| 22 | 14.508     | Pentadecane                                   | C15H32    | 0.07% |
| 23 | 14.817     | Phenol, 4-amino-2-isopropyl-5-methyl-         | C10H15NO  | 0.08% |
| 24 | 15.429     | Dodecanoic acid                               | C12H24O2  | 0.19% |
| 25 | 17.157     | 1,7-Trimethylene-2,3-dimethylindole           | C13H15N   | 0.09% |
| 26 | 17.254     | 8-Heptadecene                                 | C17H34    | 0.07% |
| 27 | 17.644     | Heptadecane                                   | C17H36    | 0.28% |
| 28 | 17.798     | Diethyl-. $\alpha$ -.naphthylamine            | C14H17N   | 0.16% |

|    |        |                                                                                                                       |             |        |
|----|--------|-----------------------------------------------------------------------------------------------------------------------|-------------|--------|
| 29 | 18.204 | 5-Phenyl-o-anisidine                                                                                                  | C13H13NO    | 0.07%  |
| 30 | 18.256 | Cyclooctane, 1,2-dimethyl-                                                                                            | C10H20      | 0.07%  |
| 31 | 18.605 | 4-Methyl-thieno(2,3-b)quinoline                                                                                       | C12H9NS     | 0.06%  |
| 32 | 18.736 | 9(2H)-Acridinone, 1,3,4,10-tetrahydro-2-methyl-                                                                       | C14H15NO    | 0.04%  |
| 33 | 19.063 | Tetradecanoic acid                                                                                                    | C14H28O2    | 4.80%  |
| 34 | 19.469 | 4-Tetradecene, (Z)-                                                                                                   | C14H28      | 0.26%  |
| 35 | 20.224 | 2-Pentadecanol                                                                                                        | C15H32O     | 0.32%  |
| 36 | 20.453 | 2-Hexadecene, 3,7,11,15-tetramethyl-, [R-[R*,R*-(E)]]-                                                                | C20H40      | 0.80%  |
| 37 | 20.756 | 2-Hexadecene, 3,7,11,15-tetramethyl-, [R-[R*,R*-(E)]]-                                                                | C20H40      | 1.48%  |
| 38 | 21.208 | 1,2,3-Trimethyl-2-vinyl-1,3-diaza-2-silacyclopentane                                                                  | C7H16N2Si   | 0.27%  |
| 39 | 21.3   | Cyclopentane, 1-methyl-2-acetyl-3-(1-methylethenyl)-                                                                  | C11H18O     | 0.26%  |
| 40 | 22.004 | Tetradecane                                                                                                           | C14H30      | 0.06%  |
| 41 | 22.662 | Hexadecanoic acid, methyl ester                                                                                       | C17H34O2    | 0.08%  |
| 42 | 23.354 | cis-9-Hexadecenoic acid                                                                                               | C16H30O2    | 19.97% |
| 43 | 23.892 | n-Hexadecanoic acid                                                                                                   | C16H32O2    | 19.24% |
| 44 | 24.069 | Tetradecanamide                                                                                                       | C14H29NO    | 1.65%  |
| 45 | 24.836 | N-Methyldodecanamide                                                                                                  | C13H27NO    | 0.72%  |
| 46 | 25.946 | N,N-Dimethyldodecanamide                                                                                              | C14H29NO    | 0.46%  |
| 47 | 28.275 | 6-Octadecenoic acid, (Z)-                                                                                             | C18H34O2    | 2.53%  |
| 48 | 28.716 | 9-Octadecenamide, (Z)-                                                                                                | C18H35NO    | 2.06%  |
| 49 | 29.265 | Hexadecanamide                                                                                                        | C16H33NO    | 3.98%  |
| 50 | 30.175 | N-Methyldodecanamide                                                                                                  | C13H27NO    | 3.69%  |
| 51 | 30.69  | Non-7-enoic acid, dimethylamide                                                                                       | C11H21NO    | 0.99%  |
| 52 | 31.17  | Octanamide, N,N-dimethyl-                                                                                             | C10H21NO    | 0.09%  |
| 53 | 31.273 | N,N-Dimethyldecanamide                                                                                                | C12H25NO    | 2.41%  |
| 54 | 33.659 | Formamide, N,N-diethyl-                                                                                               | C5H11NO     | 0.27%  |
| 55 | 33.934 | 9-Octadecenamide, (Z)-                                                                                                | C18H35NO    | 0.45%  |
| 56 | 34.071 | Undecanoic acid, pyrrolidide                                                                                          | C15H29NO    | 0.55%  |
| 57 | 34.758 | Propanamide, N,N-dibutyl-3-cyclopentyl-                                                                               | C16H31NO    | 0.45%  |
| 58 | 34.878 | 3-[3-(5-Amino-[1,3,4]thiadiazol-2-yl)-propyl]-3H-benzooxazol-2-one                                                    | C12H12N4O2S | 2.30%  |
| 59 | 38.792 | 9-Hexadecenoic acid, pyrrolidide                                                                                      | C23H36O2    | 0.96%  |
| 60 | 39.244 | 9-Octadecenamide, n-butyl-                                                                                            | C22H43NO    | 0.16%  |
| 61 | 39.347 | n-Dodecanoylpyrrolidine                                                                                               | C16H31NO    | 2.31%  |
| 62 | 40.343 | Piperazine, 1-methyl-4-[2-(p-tolylsulfonyl)ethyl]-                                                                    | C14H22N2O2S | 0.29%  |
| 63 | 42.826 | Oxalic acid, monoamide, N-(2-phenylethyl)-, heptyl ester                                                              | C14H21NO3S  | 0.34%  |
| 64 | 43.621 | 9-Hexadecenoic acid, pyrrolidide                                                                                      | C23H36O2    | 0.28%  |
| 65 | 44.531 | 3-Methoxy-D-homoestra-1,3,5(10),8-tetraene-17a-one, (14.beta.)                                                        | C20H24O2    | 0.28%  |
| 66 | 45.149 | 17-(1,5-Dimethylhexyl)-10,13-dimethyl-4,5,6,7,8,9,10,11,12,13,14,15,16,17-tetradecahydro-3H-cyclopenta[a]phenanthrene | C27H46      | 0.32%  |
| 67 | 46.185 | Oxirane, hexadecyl-                                                                                                   | C18H36O     | 0.16%  |
| 68 | 46.414 | Cholesta-3,5-diene                                                                                                    | C27H44      | 0.43%  |
| 69 | 47.192 | Oxalic acid, butyl 2-phenylethyl ester                                                                                | C14H18O4    | 0.91%  |
| 70 | 47.644 | Phthalic acid, butyl 2-phenylethyl ester                                                                              | C21H32O5    | 1.60%  |
| 71 | 51.214 | Cholesterol                                                                                                           | C27H46O     | 1.23%  |
| 72 | 51.746 | Vitamin E                                                                                                             | C29H50O2    | 0.93%  |

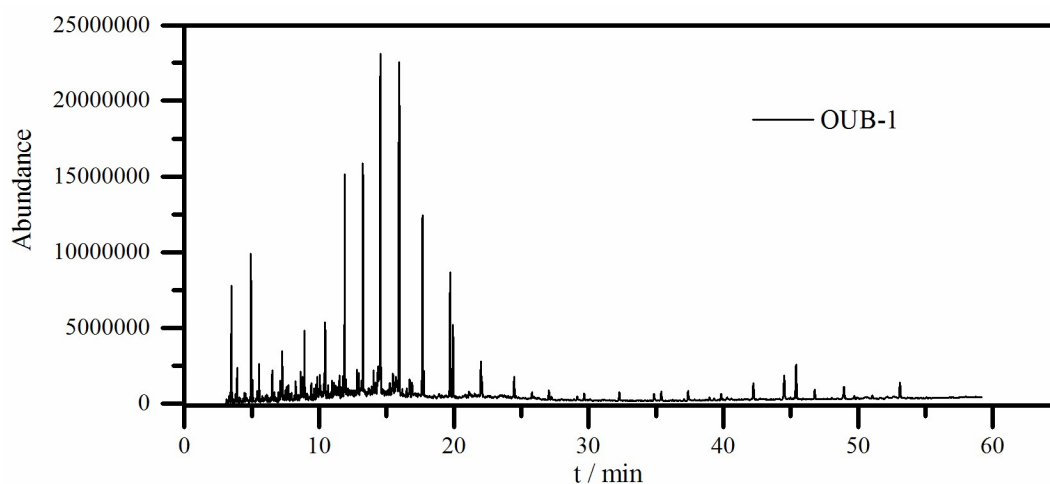

**Fig. 2 Total ion chromatogram of OUB-1**

The main peaks of ion chromatogram for OUB-1 appeared between 3 min to 20 min. There are still existed some small peaks after 20min. The highest two peaks were Pentadecane and Hexadecane.

**Table 2 The composition of OUB-1 (obtained at Stage-1 upgrading under the optimized condition).**

| No. | R.T. (min) | Compounds                         | Formation | Area  |
|-----|------------|-----------------------------------|-----------|-------|
| 1   | 3.304      | Cyclopentene, 4,4-dimethyl-       | C7H12     | 0.25% |
| 2   | 3.419      | Heptane, 2-methyl-                | C8H18     | 0.20% |
| 3   | 3.487      | Toluene                           | C7H8      | 2.57% |
| 4   | 3.791      | cis-1-Butyl-2-methylcyclopropane  | C8H16     | 0.29% |
| 5   | 3.911      | Octane                            | C8H18     | 0.76% |
| 6   | 4.472      | Cyclohexane, ethyl-               | C8H16     | 0.25% |
| 7   | 4.941      | Ethylbenzene                      | C8H10     | 3.12% |
| 8   | 5.072      | Benzene, 1,3-dimethyl-            | C8H10     | 0.46% |
| 9   | 5.404      | 1-Nonene                          | C9H18     | 0.26% |
| 10  | 5.479      | Benzene, 1,3-dimethyl-            | C8H10     | 0.25% |
| 11  | 5.547      | Nonane                            | C9H20     | 0.70% |
| 12  | 6.131      | Octane, 2,6-dimethyl-             | C10H22    | 0.19% |
| 13  | 6.52       | Benzene, propyl-                  | C9H12     | 0.59% |
| 14  | 6.657      | Benzene, 1-ethyl-3-methyl-        | C9H12     | 0.29% |
| 15  | 6.978      | Benzene, 1-ethyl-2-methyl-        | C9H12     | 0.23% |
| 16  | 7.121      | 1-Decene                          | C10H20    | 0.55% |
| 17  | 7.207      | Benzene, 1,2,4-trimethyl-         | C9H12     | 0.19% |
| 18  | 7.264      | Decane                            | C10H22    | 0.87% |
| 19  | 7.607      | 1H-Pyrrole, 2,3,5-trimethyl-      | C7H11N    | 0.28% |
| 20  | 7.71       | Benzene, 1,2,4-trimethyl-         | C9H12     | 0.34% |
| 21  | 7.945      | Benzene, cyclopropyl-             | C9H10     | 0.23% |
| 22  | 8.168      | Phenol, 2-methyl-                 | C7H8O     | 0.20% |
| 23  | 8.26       | Benzene, butyl-                   | C10H14    | 0.47% |
| 24  | 8.3        | Phenol, 2-methyl-                 | C7H8O     | 0.32% |
| 25  | 8.563      | Benzenamine, 3-methyl-            | C7H9N     | 0.18% |
| 26  | 8.637      | Phenol, 4-methyl-                 | C7H8O     | 0.95% |
| 27  | 8.775      | 1-Undecene                        | C11H22    | 0.51% |
| 28  | 8.906      | Undecane                          | C11H24    | 1.18% |
| 29  | 8.963      | 1H-Pyrrole, 3-ethyl-2,4-dimethyl- | C8H13N    | 0.31% |

|    |        |                                                                |           |        |
|----|--------|----------------------------------------------------------------|-----------|--------|
| 30 | 9.41   | 1H-Pyrrole, 2,3,4,5-tetramethyl-                               | C8H13N    | 0.41%  |
| 31 | 9.621  | Phenol, 2-ethyl-                                               | C8H10O    | 0.31%  |
| 32 | 9.782  | Phenol, 2,4-dimethyl-                                          | C8H10O    | 0.58%  |
| 33 | 9.867  | Phenylethyl Alcohol                                            | C8H10O    | 0.53%  |
| 34 | 10.062 | Phenol, 4-ethyl-                                               | C8H10O    | 0.51%  |
| 35 | 10.325 | Cyclododecane                                                  | C12H24    | 0.30%  |
| 36 | 10.388 | 1H-Pyrrole, 3-ethyl-2,4,5-trimethyl-                           | C9H15N    | 0.73%  |
| 37 | 10.451 | Dodecane                                                       | C12H26    | 1.27%  |
| 38 | 10.657 | Undecane, 2,6-dimethyl-                                        | C13H28    | 0.23%  |
| 39 | 10.955 | Phenol, 2,4,6-trimethyl-                                       | C9H12O    | 0.56%  |
| 40 | 11.109 | Phenol, 4-ethyl-3-methyl-                                      | C9H12O    | 0.27%  |
| 41 | 11.389 | Benzene, hexyl-                                                | C12H18    | 0.19%  |
| 42 | 11.464 | Phenol, 3,5-dimethyl-                                          | C8H10O    | 0.20%  |
| 43 | 11.744 | 6-Tridecene, (Z)-                                              | C13H26    | 0.19%  |
| 44 | 11.779 | 1-Tridecene                                                    | C13H26    | 0.40%  |
| 45 | 11.899 | Tridecane                                                      | C13H28    | 4.55%  |
| 46 | 12.156 | Thymol                                                         | C10H14O   | 0.24%  |
| 47 | 12.54  | Heptylcyclohexane                                              | C13H26    | 0.18%  |
| 48 | 12.82  | Naphthalene, 1,2,3,4-tetrahydro-1,1,6-trimethyl-               | C13H18    | 0.70%  |
| 49 | 12.934 | Dodecane, 2,6,11-trimethyl-                                    | C15H32    | 0.38%  |
| 50 | 13.049 | Acetamide, N-[1-(4-hydroxyphenyl)ethyl]-                       | C10H13NO2 | 0.20%  |
| 51 | 13.135 | 2-Tetradecene, (E)-                                            | C14H28    | 0.23%  |
| 52 | 13.249 | Tetradecane                                                    | C14H30    | 4.97%  |
| 53 | 13.438 | Acetamide, N-[1-(4-hydroxyphenyl)ethyl]-                       | C10H13NO2 | 0.20%  |
| 54 | 14.039 | Heptadecane, 2,6,10,14-tetramethyl-                            | C21H44    | 0.50%  |
| 55 | 14.182 | Cyclopentane, 1,1'-[3-(2-cyclopentylethyl)-1,5-pentanediy]bis- | C22H40    | 0.37%  |
| 56 | 14.291 | Cyclopentadecane                                               | C15H30    | 0.18%  |
| 57 | 14.359 | 6-Tridecene                                                    | C13H26    | 0.41%  |
| 58 | 14.559 | Pentadecane                                                    | C15H32    | 15.22% |
| 59 | 15.252 | Cyclohexane, 1,1'-(1,4-butanediyl)bis-                         | C16H30    | 0.35%  |
| 60 | 15.481 | 1H-Indole, 5,6,7-trimethyl-                                    | C11H13N   | 0.42%  |
| 61 | 15.692 | 7-Hexadecene, (Z)-                                             | C16H32    | 0.75%  |
| 62 | 15.778 | 7-Hexadecene, (Z)-                                             | C16H32    | 0.40%  |
| 63 | 15.95  | Hexadecane                                                     | C16H34    | 15.08% |
| 64 | 16.493 | 5-Methyl-3-isopropylindole                                     | C12H15N   | 0.27%  |
| 65 | 16.717 | Tridecane, 5-propyl-                                           | C16H34    | 0.65%  |
| 66 | 16.888 | Cyclopentane, undecyl-                                         | C16H32    | 0.74%  |
| 67 | 17.672 | Heptadecane                                                    | C17H36    | 5.94%  |
| 68 | 17.775 | Pentadecane, 2,6,10,14-tetramethyl-                            | C19H40    | 0.84%  |
| 69 | 19.721 | Octadecane                                                     | C18H38    | 4.39%  |
| 70 | 19.938 | Hexadecane, 2,6,10,14-tetramethyl-                             | C20H42    | 2.76%  |
| 71 | 21.128 | E-15-Heptadecenal                                              | C17H32O   | 0.26%  |
| 72 | 22.004 | Nonadecane                                                     | C19H40    | 1.42%  |
| 73 | 24.47  | Eicosane                                                       | C20H42    | 0.89%  |
| 74 | 25.797 | Nonane, 4,5-dimethyl-                                          | C11H24    | 0.26%  |
| 75 | 27.051 | Heneicosane                                                    | C21H44    | 0.41%  |
| 76 | 27.239 | Heptadecanenitrile                                             | C17H33N   | 0.18%  |
| 77 | 29.145 | Dodecanamide                                                   | C12H25NO  | 0.22%  |
| 78 | 29.665 | Heptadecane                                                    | C17H36    | 0.31%  |
| 79 | 32.28  | Heptadecane                                                    | C17H36    | 0.41%  |
| 80 | 34.85  | Tetracosane                                                    | C24H50    | 0.34%  |

|    |        |                                                           |          |       |
|----|--------|-----------------------------------------------------------|----------|-------|
| 81 | 35.387 | Phenol, 2,2'-methylenebis[6-(1,1-dimethylethyl)-4-methyl- | C23H32O2 | 0.43% |
| 82 | 37.379 | Heneicosane                                               | C21H44   | 0.53% |
| 83 | 39.833 | Octadecane                                                | C18H38   | 0.27% |
| 84 | 42.225 | Heneicosane                                               | C21H44   | 0.87% |
| 85 | 44.514 | Coprostane                                                | C27H48   | 1.47% |
| 86 | 45.395 | Cholestane                                                | C27H48   | 1.87% |
| 87 | 46.78  | Tetracosane                                               | C24H50   | 0.53% |
| 88 | 48.943 | Octadecane                                                | C18H38   | 0.64% |
| 89 | 53.103 | Tetracosane                                               | C24H50   | 0.81% |

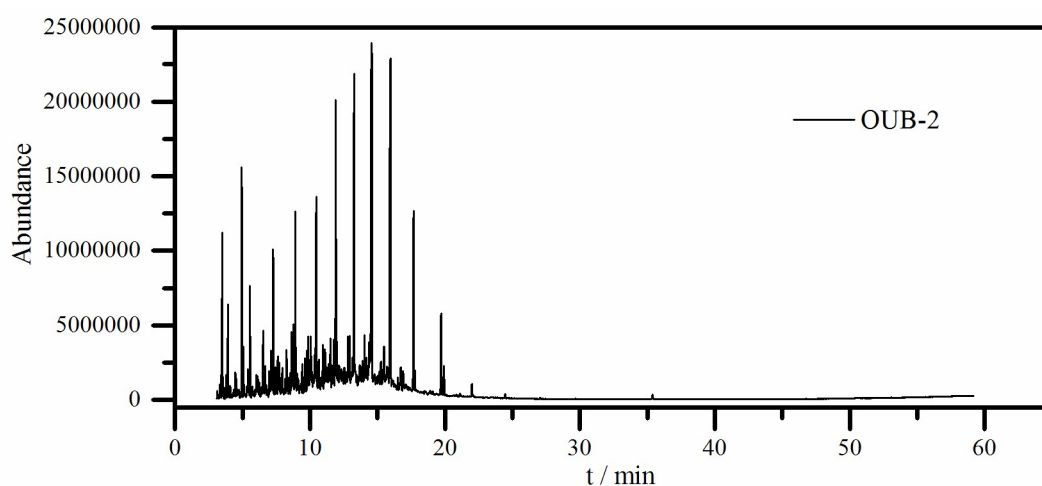

**Fig. 3 Total ion chromatogram of OUB-2**

The main peaks of ion chromatogram for OUB-2 appeared between 3 min to 20 min and the peaks between 3 min to 12 min accounts a higher ratio than OUB-1. The peaks after 20min were less.

**Table 3 The composition of OUB-2 ( Stage-2 obtained optimized upgrading biofuel)**

| No. | R.T. (min) | Compounds                              | Formation | Area  |
|-----|------------|----------------------------------------|-----------|-------|
| 1   | 3.133      | 2-Heptyne                              | C7H12     | 0.15% |
| 2   | 3.31       | Cyclopentene, 4,4-dimethyl-            | C7H12     | 0.33% |
| 3   | 3.419      | Heptane, 2-methyl-                     | C8H18     | 0.34% |
| 4   | 3.487      | Toluene                                | C7H8      | 2.36% |
| 5   | 3.63       | Cyclohexane, 1,2-dimethyl-, trans-     | C8H16     | 0.21% |
| 6   | 3.785      | 1,2-Cyclohexanedione                   | C6H8O2    | 0.67% |
| 7   | 3.911      | Octane                                 | C8H18     | 1.40% |
| 8   | 4.014      | 2-Octene, (Z)-                         | C8H16     | 0.15% |
| 9   | 4.088      | Cyclopentene, 1,2,3-trimethyl-         | C8H14     | 0.18% |
| 10  | 4.471      | Cyclohexane, ethyl-                    | C8H16     | 0.45% |
| 11  | 4.529      | Methyl ethyl cyclopentene              | C8H14     | 0.21% |
| 12  | 4.946      | Ethylbenzene                           | C8H10     | 3.52% |
| 13  | 5.072      | Benzene, 1,3-dimethyl-                 | C8H10     | 0.77% |
| 14  | 5.324      | Cyclopentane, 1-methyl-2-propyl-       | C9H18     | 0.24% |
| 15  | 5.404      | 1-Nonene                               | C9H18     | 0.40% |
| 16  | 5.479      | o-Xylene                               | C8H10     | 0.38% |
| 17  | 5.553      | Nonane                                 | C9H20     | 1.44% |
| 18  | 5.707      | Cyclohexane, 1-ethyl-2-methyl-, trans- | C9H18     | 0.19% |
| 19  | 6.022      | 1H-Pyrrole, 2,5-dimethyl-              | C6H9N     | 0.41% |

|    |        |                                                  |               |       |
|----|--------|--------------------------------------------------|---------------|-------|
| 20 | 6.102  | Cyclohexane, propyl-                             | C9H18         | 0.25% |
| 21 | 6.24   | 1H-Pyrrole, 2,3-dimethyl-                        | C6H9N         | 0.34% |
| 22 | 6.405  | cis-1,4-Dimethyl-2-methylenecyclohexane          | C9H16         | 0.15% |
| 23 | 6.526  | Benzene, propyl-                                 | C9H12         | 0.82% |
| 24 | 6.657  | Benzene, 1-ethyl-2-methyl-                       | C9H12         | 0.49% |
| 25 | 6.772  | Octane, 2,6-dimethyl-                            | C10H22        | 0.14% |
| 26 | 6.978  | Benzene, 1-ethyl-2-methyl-                       | C9H12         | 0.46% |
| 27 | 7.029  | Cyclodecane                                      | C10H20        | 0.19% |
| 28 | 7.121  | 1-Decene                                         | C10H20        | 1.03% |
| 29 | 7.212  | Benzene, 1,2,3-trimethyl-                        | C9H12         | 0.32% |
| 30 | 7.269  | Decane                                           | C10H22        | 1.84% |
| 31 | 7.453  | 1H-Pyrrole, 2-ethyl-4-methyl-                    | C7H11N        | 0.40% |
| 32 | 7.504  | Benzene, (1-methylpropyl)-                       | C10H14        | 0.18% |
| 33 | 7.538  | 1H-Pyrrole, 2-ethyl-4-methyl-                    | C7H11N        | 0.19% |
| 34 | 7.607  | 1H-Pyrrole, 2,3,5-trimethyl-                     | C7H11N        | 0.55% |
| 35 | 7.647  | 1H-Pyrrole, 2-ethyl-4-methyl-                    | C7H11N        | 0.24% |
| 36 | 7.71   | Benzene, 1,2,4-trimethyl-                        | C9H12         | 0.55% |
| 37 | 7.842  | Cyclohexane, butyl-                              | C10H20        | 0.22% |
| 38 | 7.899  | Cyclopentane, pentyl-                            | C10H20        | 0.15% |
| 39 | 7.945  | Tetracyclo[3.3.1.0(2,8).0(4,6)]-non-2-ene        | C9H10         | 0.58% |
| 40 | 8.259  | Benzene, butyl-                                  | C10H14        | 0.73% |
| 41 | 8.443  | Benzene, 1-methyl-2-propyl-                      | C10H14        | 0.22% |
| 42 | 8.551  | Benzenamine, 3-methyl-                           | C7H9N         | 0.34% |
| 43 | 8.637  | Phenol, 4-methyl-                                | C7H8O         | 1.34% |
| 44 | 8.78   | Indan, 1-methyl-                                 | C10H12        | 1.19% |
| 45 | 8.917  | Undecane                                         | C11H24        | 2.27% |
| 46 | 8.963  | 1H-Pyrrole, 3-ethyl-2,4-dimethyl-                | C8H13N        | 0.29% |
| 47 | 9.06   | 1H-Pyrrole, 3-ethyl-2,4-dimethyl-                | C8H13N        | 0.29% |
| 48 | 9.226  | Naphthalene, decahydro-2-methyl-                 | C11H20        | 0.14% |
| 49 | 9.415  | 5-Dimethylaminopyrimidine                        | C6H9N3        | 0.59% |
| 50 | 9.507  | Cyclohexane, pentyl-                             | C11H22        | 0.22% |
| 51 | 9.558  | Cyclopentane, hexyl-                             | C11H22        | 0.18% |
| 52 | 9.621  | 1H-Indene, 2,3-dihydro-4-methyl-                 | C10H12        | 0.60% |
| 53 | 9.696  | Bicyclo[4.2.0]octa-1,3,5-triene, 7-isopropyl-    | C11H14        | 0.19% |
| 54 | 9.793  | Benzene, 1-methyl-2-(2-propenyl)-                | C10H12        | 1.17% |
| 55 | 9.993  | Naphthalene, 1,2,3,4-tetrahydro-                 | C10H12        | 0.19% |
| 56 | 10.062 | Phenol, 4-ethyl-                                 | C8H10O        | 0.76% |
| 57 | 10.331 | 1-Dodecene                                       | C12H24        | 0.25% |
| 58 | 10.457 | Dodecane                                         | C12H26        | 2.57% |
| 59 | 10.525 | .alpha.,.beta.,.beta.-Trimethylstyrene           | C11H14        | 0.37% |
| 60 | 10.657 | Undecane, 2,6-dimethyl-                          | C13H28        | 0.38% |
| 61 | 10.954 | 2,3-Dimethylanisole                              | C9H12O        | 1.00% |
| 62 | 11.115 | Phenol, 2-ethyl-5-methyl-                        | C9H12O        | 0.45% |
| 63 | 11.395 | Benzene, hexyl-                                  | C12H18        | 0.33% |
| 64 | 11.504 | Sulfurous acid, 2-ethylhexyl heptadecyl ester    | C25H52O3<br>S | 0.85% |
| 65 | 11.778 | 1-Tridecene                                      | C13H26        | 0.61% |
| 66 | 11.847 | Cyclotridecane                                   | C13H26        | 0.19% |
| 67 | 11.91  | Tridecane                                        | C13H28        | 5.41% |
| 68 | 11.967 | Naphthalene, 2-methyl-                           | C11H10        | 0.88% |
| 69 | 12.162 | 2,5-Diethylphenol                                | C10H14O       | 0.23% |
| 70 | 12.545 | Heptylcyclohexane                                | C13H26        | 0.33% |
| 71 | 12.826 | Naphthalene, 1,2,3,4-tetrahydro-1,1,6-trimethyl- | C13H18        | 0.66% |
| 72 | 12.934 | Dodecane, 2,6,11-trimethyl-                      | C15H32        | 0.58% |
| 73 | 13.14  | 1-Tetradecene                                    | C14H28        | 0.22% |

|    |        |                                                           |          |        |
|----|--------|-----------------------------------------------------------|----------|--------|
| 74 | 13.266 | Tetradecane                                               | C14H30   | 6.45%  |
| 75 | 13.913 | Cyclotetradecane                                          | C14H28   | 0.29%  |
| 76 | 14.039 | Heptadecane, 2,6,10,14-tetramethyl-                       | C21H44   | 0.67%  |
| 77 | 14.187 | Cyclopentadecane                                          | C15H30   | 0.59%  |
| 78 | 14.393 | 1H-Indole, 1-ethyl-                                       | C10H11N  | 0.91%  |
| 79 | 14.576 | Pentadecane                                               | C15H32   | 14.18% |
| 80 | 15.12  | Pentadecane, 7-methyl-                                    | C16H34   | 0.22%  |
| 81 | 15.252 | Cyclopentane, decyl-                                      | C15H30   | 0.42%  |
| 82 | 15.486 | Ethanone, 1-(1H-indol-3-yl)-                              | C10H9NO  | 0.68%  |
| 83 | 15.967 | Hexadecane                                                | C16H34   | 14.19% |
| 84 | 16.499 | 1H-Indole, 2,3-dihydro-1,3,3-trimethyl-2-methylene-       | C12H15N  | 0.29%  |
| 85 | 16.722 | Pentadecane, 2,6,10-trimethyl-                            | C18H38   | 0.60%  |
| 86 | 16.894 | Cyclopentane, undecyl-                                    | C16H32   | 0.63%  |
| 87 | 17.672 | Heptadecane                                               | C17H36   | 4.17%  |
| 88 | 17.775 | Pentadecane, 2,6,10,14-tetramethyl-                       | C19H40   | 0.46%  |
| 89 | 19.709 | Octadecane                                                | C18H38   | 1.98%  |
| 90 | 19.921 | Hexadecane, 2,6,10,14-tetramethyl-                        | C20H42   | 0.81%  |
| 91 | 21.992 | Nonadecane                                                | C19H40   | 0.43%  |
| 92 | 35.376 | Phenol, 2,2'-methylenebis[6-(1,1-dimethylethyl)-4-methyl- | C23H32O2 | 0.16%  |
